- intracellular calcium homeostasis with different potencies. *ANESTHESIOLOGY* 2008; 109:243–50
5. Bercker S, Bert B, Bittigau P, Felderhoff-Müser U, Bühner C, Ikonomidou C, Weise M, Kaisers UX, Kerner T: Neurodegeneration in newborn rats following propofol and sevoflurane anesthesia. *Neurotox Res* 2009; 16:140–7
  6. Liang G, Ward C, Peng J, Zhao Y, Huang B, Wei H: Isoflurane causes greater neurodegeneration than an equivalent exposure of sevoflurane in the developing brain of neonatal mice. *ANESTHESIOLOGY* 2010; 112:1325–34
  7. Spahr-Schopfer I, Vutskits L, Toni N, Buchs PA, Parisi L, Müller D: Differential neurotoxic effects of propofol on dissociated cortical cells and organotypic hippocampal cultures. *ANESTHESIOLOGY* 2000; 92:1408–17
  8. Lin D, Feng C, Cao M, Zuo Z: Volatile anesthetics may not induce significant toxicity to human neuron-like cells. *Anesth Analg* 2011; 112:1194–8
  9. Yon JH, Daniel-Johnson J, Carter LB, Jevtovic-Todorovic V: Anesthesia induces neuronal cell death in the developing rat brain *via* the intrinsic and extrinsic apoptotic pathways. *Neuroscience* 2005; 135:815–27
  10. Head BP, Patel HH, Niesman IR, Drummond JC, Roth DM, Patel PM: Inhibition of p75 neurotrophin receptor attenuates isoflurane-mediated neuronal apoptosis in the neonatal central nervous system. *ANESTHESIOLOGY* 2009; 110:813–25
  11. Olney JW, Young C, Wozniak DF, Ikonomidou C, Jevtovic-Todorovic V: Anesthesia-induced developmental neuroapoptosis. Does it happen in humans? *ANESTHESIOLOGY* 2004; 101:273–5
  12. Sonner JM: Issues in the design and interpretation of minimum alveolar anesthetic concentration (MAC) studies. *Anesth Analg* 2002; 95:609–14
  13. Stratmann G, Sall JW, Eger EI 2nd, Laster MJ, Bell JS, May LD, Eilers H, Krause M, Heusen F, Gonzalez HE: Increasing the duration of isoflurane anesthesia decreases the minimum alveolar anesthetic concentration in 7-day-old but not in 60-day-old rats. *Anesth Analg* 2009; 109:801–6
  14. Eger EI 2nd, Johnson BH: MAC of I-653 in rats, including a test of the effect of body temperature and anesthetic duration. *Anesth Analg* 1987; 66:974–6
  15. Eger EI 2nd, Saidman LJ, Brandstater B: Minimum alveolar anesthetic concentration: A standard of anesthetic potency. *ANESTHESIOLOGY* 1965; 26:756–63
  16. Stoelting RK, Hillier SC: Pharmacokinetics and pharmacodynamics of injected and inhaled drugs, *Pharmacology and Physiology in Anesthetic Practice*, 4th edition. Edited by Stoelting RK. Philadelphia, Lippincott Williams & Wilkins, 2005, pp 3–35
  17. Sonner JM, Gong D, Eger EI 2nd: Naturally occurring variability in anesthetic potency among inbred mouse strains. *Anesth Analg* 2000; 91:720–6
  18. Stratmann G, May LD, Sall JW, Alvi RS, Bell JS, Ormerod BK, Rau V, Hilton JF, Dai R, Lee MT, Visrodia KH, Ku B, Zusmer EJ, Guggenheim J, Firouzian A: Effect of hypercarbia and isoflurane on brain cell death and neurocognitive dysfunction in 7-day-old rats. *ANESTHESIOLOGY* 2009; 110:849–61

(Accepted for publication June 30, 2011.)

## A Call for Caution Regarding Cervical and Ulnar Nerve Injuries and General Anesthesia

To the Editor:

I read with interest the recent editorial by Lanier and Warner of the Mayo Clinic on new perioperative cervical injury.<sup>1</sup>

The authors state in a somewhat cavalier manner that “Spinal cord injury associated with airway instrumentation was uncommon, accounting for a mere 11% of patients.<sup>1</sup>” They seem to be suggesting that anesthesia providers do not need to be greatly concerned with these injuries, and they compare them with postoperative ulnar nerve injuries. They cite a study from their institution that they claim dismisses the culpability of anesthesia providers as the cause of these postoperative ulnar nerve injuries because “. . . ulnar injuries were never present at the completion of surgery, and most did not appear until 1 or 2 days after surgery.<sup>2</sup>” However, Miller and Camp have indicated that ulnar injuries were noted in five patients immediately upon awakening from general anesthesia and were attributed to preventable errors.<sup>3</sup>

Lanier and Warner state “We wonder whether future research will also lessen the culpability and legal risk of anesthesia providers regarding new onset cervical injuries.<sup>1</sup>” I suggest that anesthesiologists maintain a careful and cautious approach in an attempt to prevent both neck and ulnar nerve injuries by using every means at their disposal to lessen the incidence of these serious and persistent problems.

**Mitchel B. Sosis, M.S., M.D., Ph.D.,** Campus Eye Group, Hamilton Square, New Jersey. mbs4117@yahoo.com

## References

1. Lanier WL, Warner MA: New perioperative cervical injury: Medical and legal implications for patients and anesthesia providers. *ANESTHESIOLOGY* 2011; 114:729–31
2. Warner MA, Warner DO, Matsumoto JY, Harper CM, Schroeder DR, Maxson PM: Ulnar neuropathy in surgical patients. *ANESTHESIOLOGY* 1999; 90:54–9
3. Miller RG, Camp PE: Postoperative ulnar neuropathy. *JAMA* 1979; 242:1636–9

(Accepted for publication August 1, 2011.)

## In Reply:

We wish to thank Dr. Sosis for his letter commenting on our editorial. His communication, along with the original article of Hindman *et al.*,<sup>1</sup> and our editorial<sup>2</sup> all agree that new-onset perioperative neurologic deficits, whether minor or severe, are always of concern to clinicians and patients. Every effort should be made to lessen patient risk; however, we reaffirm that these efforts must be based on scientific foundations, not speculation and innuendo.

A central purpose of the Hindman *et al.* article, previous research from Mayo Clinic (cited in our editorial<sup>2</sup>), and our editorial was to offer insights into the scope of new-onset neurologic deficits after anesthesia and surgery, factors contributing to those deficits, and remediable limitations in the delivery of health care affecting outcomes. Before relatively recent research, patients, clinicians, plaintiffs’ lawyers, and expert witnesses representing plaintiffs largely assumed that if a patient experienced a perioperative neurologic deficit, some individual or individuals on the healthcare team must
